# Supplementary material for: Seroprevalence of Bovine Brucellosis and its Public Health Significance in Central High Land of Ethiopia
Source: Research Square preprint supplement (doi:10.21203/rs.3.rs-658842/v1), 2021-06-28
Supplement: Supplementary file 1 [file d7a49b45a4e7ac7daa49c314.docx]

Ethics approval and consent to participate
